# Supplementary material
Source: PubMed Central journal article supplement (PMC5710274)

## Supplementary Online Content

Colón-Emeric CS, Corazzini K, McConnell ES, et al. Effect of promoting high-quality staff interactions on fall prevention in nursing homes: a cluster-randomized trial. *JAMA Intern Med*. Published online October 2, 2017. doi:10.1001/jamainternmed.2017.5073

**eFigure.** Intervention and data collection timeline

This supplementary material has been provided by the authors to give readers additional information about their work.

eFigure. Intervention and data collection timeline

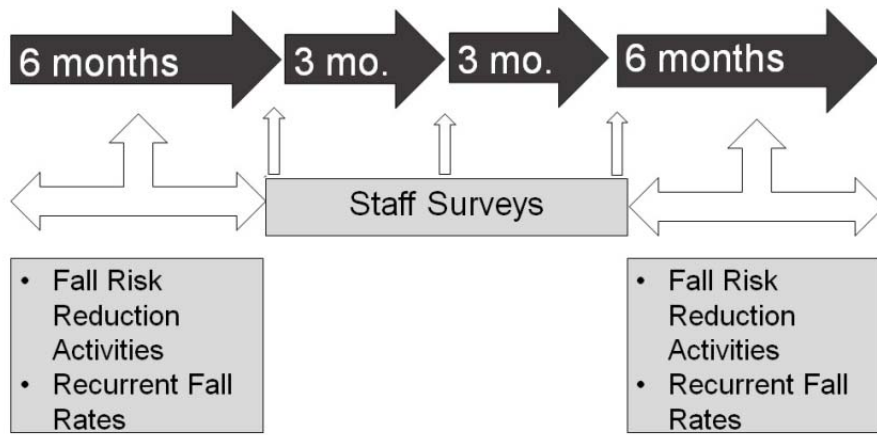

Supplement: jamainternmed-177-1634-s002.pdf [file jamainternmed-177-1634-s002.pdf]
